# Supplementary material for: Systematic Analysis of Sex-Linked Molecular Alterations and Therapies in Cancer
Source: PubMed Central journal article supplement (PMC4709570; doi:10.1038/srep19119), 2016-01-12
Supplement: srep19119-s1.pdf [file srep19119-s1.pdf]

**Supplementary Materials**

|      |                                       |      |                        |      |                                   |
|------|---------------------------------------|------|------------------------|------|-----------------------------------|
| BLCA | Bladder Urothelial Carcinoma          | COAD | Colon Adenocarcinoma   | GBM  | Glioblastoma Multiforme           |
| HNSC | Head & Neck Squamous Cell Carcinoma   | KICH | Kidney Chromophobe     | KIRC | Kidney Renal Clear Cell Carcinoma |
| KIRP | Kidney Renal Papillary Cell Carcinoma | LAML | Acute Myeloid Leukemia | LGG  | Brain Lower Grade Glioma          |
| LIHC | Liver Hepatocellular Carcinoma        | LUAD | Lung Adenocarcinoma    | LUSC | Lung Squamous Cell Carcinoma      |
| PAAD | Pancreatic Adenocarcinoma             | READ | Rectal Adenocarcinoma  | SARC | Sarcoma                           |
| SKCM | Skin Cutaneous Melanoma               | THCA | Thyroid Carcinoma      |      |                                   |

**Table S1.** Cancers Analyzed in Cancer-Specific Transcriptomic Analyses and Corresponding Abbreviations. Each of these cancers included neoplastic gene expression data for at least 10 patients of each sex and thus was included in our transcriptomic analyses. The cancers highlighted in yellow included additional nonneoplastic gene expression data for at least 10 patients of each sex and thus were included in our pathway and connectivity map analyses.
